# Supplementary figures and images for: Analysis of the Mycotoxin Levels and Expression Pattern of SWN Genes at Different Time Points in the Fungus Slafractonia leguminicola
Source: MDPI journal article supplement (doi:10.3390/microorganisms12040670), 2024-03-27

RT: 0.00 - 10.09 SM: 5B

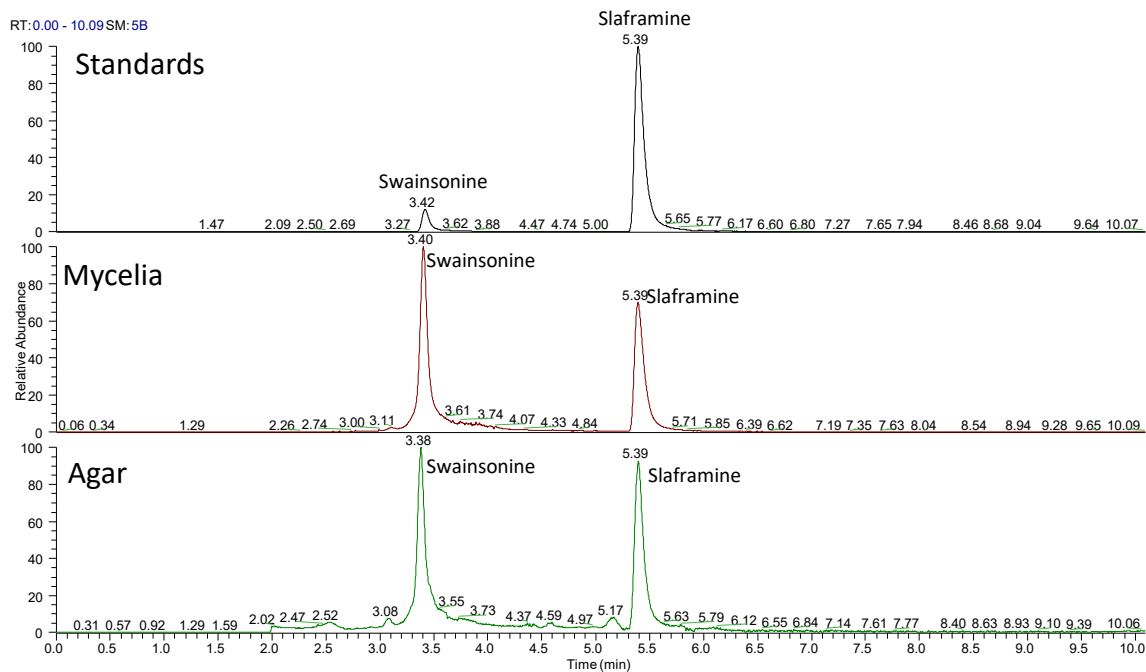

Supplement: s1 [file s1]
